# Supplementary material for: JUNB‐FBXO21‐ERK axis promotes cartilage degeneration in osteoarthritis by inhibiting autophagy
Source: PubMed Central journal article supplement (PMC7884044; doi:10.1111/acel.13306), 2021-01-15

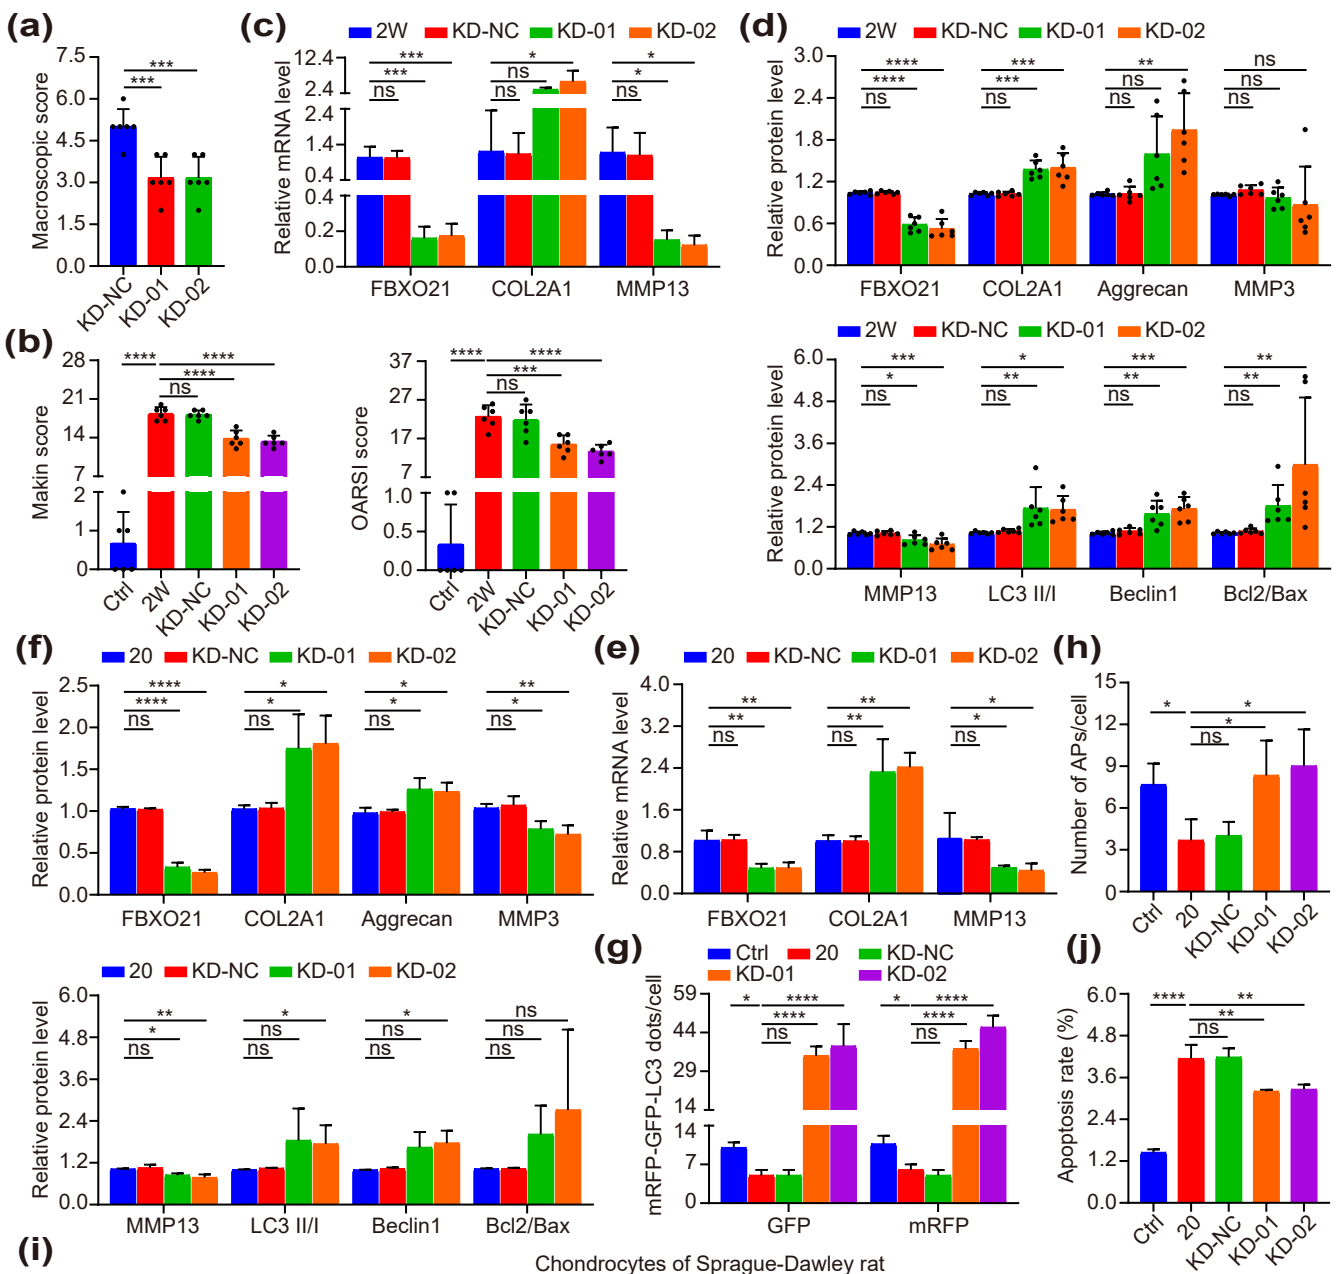

Chondrocytes of Sprague-Dawley rat

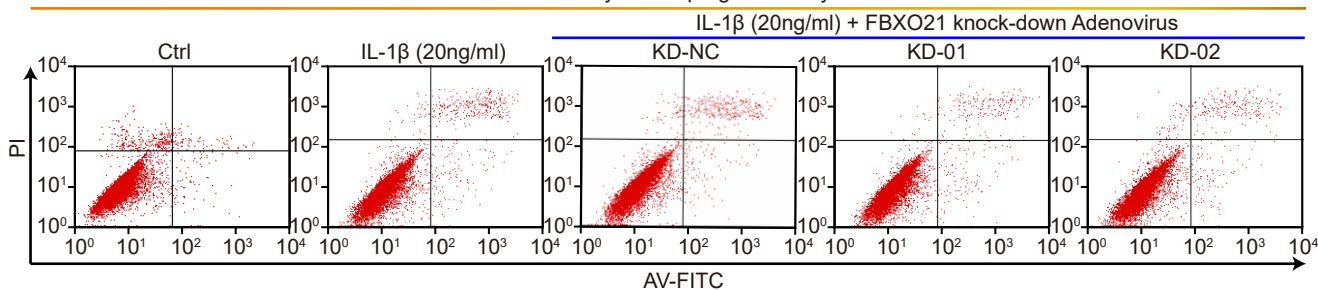

Supplement: ACEL-20-e13306-s003.pdf [file ACEL-20-e13306-s003.pdf]
