# Supplementary material for: JUNB‐FBXO21‐ERK axis promotes cartilage degeneration in osteoarthritis by inhibiting autophagy
Source: PubMed Central journal article supplement (PMC7884044; doi:10.1111/acel.13306), 2021-01-15

**(a)**

|              |   |   |   |
|--------------|---|---|---|
| OE-FBXO21    | - | - | + |
| KD-JUNB      | - | + | + |
| KD-NC        | + | - | - |
| IL-1 $\beta$ | + | + | + |

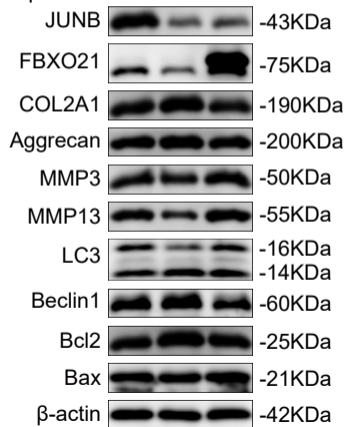**(b)**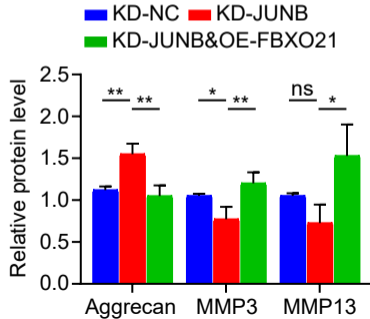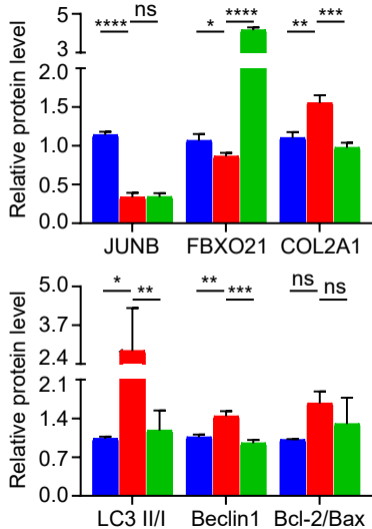

Supplement: ACEL-20-e13306-s006.pdf [file ACEL-20-e13306-s006.pdf]
